# Supplementary material
Source: PubMed Central journal article supplement (PMC3674857)
Supplement: NIHMS467999-supplement-Supplementary_Figures.pdf [file NIHMS467999-supplement-Supplementary_Figures.pdf]

## Supplementary Figure 1

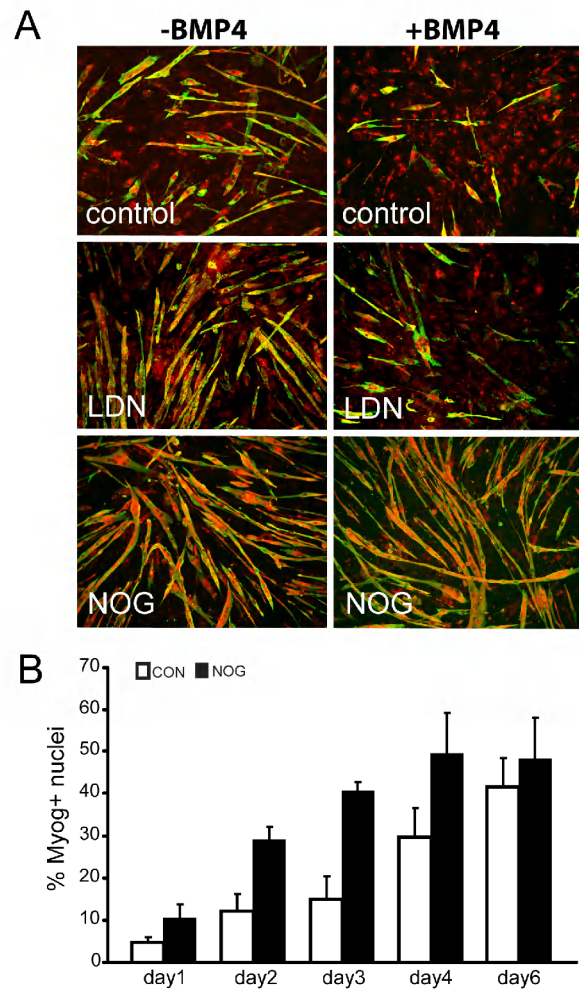

**Supplementary Fig. 1. (A)** Immunofluorescent staining of C2C12 cells differentiated for 6 days with or without Noggin (NOG; 200ng/ml) or LDN-193189 (LDN; 120nM). Staining shows desmin (myogenic cells; in red) and MyHC (differentiated myotubes; in green) and representative pictures are shown. **(B)** Quantification of the percentage of Myog+ nuclei (compared to the total amount of nuclei) of C2C12 cells at different time points of myogenic differentiation. Error bar indicates the s.d. of ten measured areas per group.

## Supplementary Figure 2

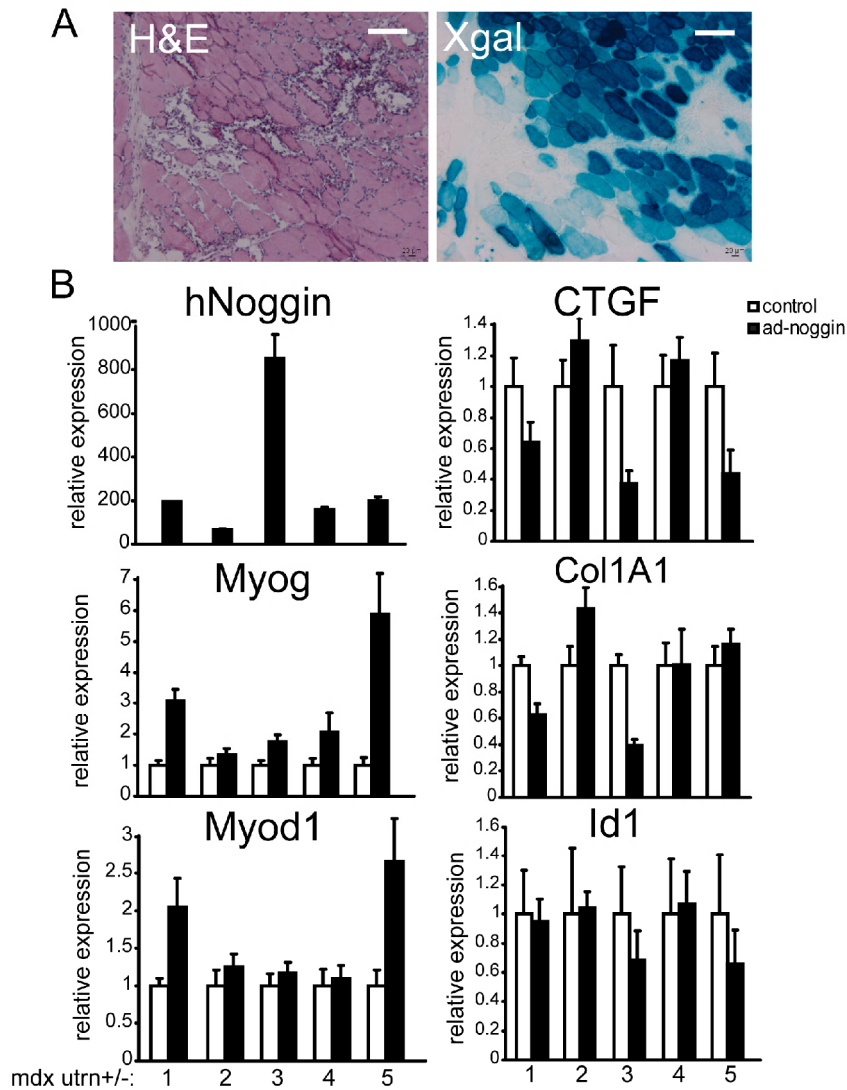

**Supplementary Fig. 2. (A)** H&E staining and X-galactosidase staining of ad-lacZ control in consecutive sections showing LacZ activity in muscle fibers of ad-LacZ injected muscle after four weeks. Scalebar=100 $\mu$ m **(B)** quantitative Real-Time PCR analysis of separate muscle cDNA samples of different genes. Expression is indicated as fold expression compared to the contralateral control muscle sample in the same mouse. Error bar indicates s.d. of triplicate measurements of each sample.
